# Supplementary material
Source: PubMed Central journal article supplement (PMC3479510)
Supplement: 1215406109_pnas.201215406SI.pdf [file 1215406109_pnas.201215406SI.pdf]

# Supporting Information

Lee et al. 10.1073/pnas.1215406109

## SI Experimental Procedures

**Constructs and Screening.** Cloning of full-length rat WNK1, non-neuronal form of human WNK3 (GenBank accession no. AJ409088) and their kinase-dead mutants WNK1(KD), WNK3(KD) to pCMV5-Myc vectors were described previously (1, 2). Brain isoform of human WNK3 (WNK3B, GenBank accession no. AY352048) was amplified from a cDNA provided by Lucy Raymond (Cambridge Institute for Medical Research, Cambridge, UK) and cloned into pCMV5-Myc. Small fragments encoding WNK1(1857C), WNK1(1804C), WNK3(1474–1743), WNK3(1–411), WNK3(1–411/KD), and WNK3B(1521–1800) were amplified and subcloned into pCMV5-Myc for mammalian expression. WNK3 fragments 1–405, 406–750, 751–990, 991–1365, 1366–1743, 991–1412, 1413–1800 were generated and transferred to pGEX-KG vector for GST pull-down. Mouse Fox-1 cDNA (GenBank accession no. AY659954) was purchased from Open Biosystems, and mouse Fox-2 cDNA (GenBank accession no. AY659951) was a gift from Mariano Garcia-Blanco (Duke University Medical Center, Durham, NC). Both of the full-length proteins and Fox-1 small fragments including 1–326, 117–396, 1–196, 1–253, 1–291, 253–396, and 196–326 were amplified to subclone into p3XFLAG-CMV-7.1 (Sigma) or pCMV5-Myc.

The FMNL3 sequence including exon 25a, its upstream 132 nt, and downstream 713 nt was amplified from human genomic DNA (a gift from Kristen Lynch, University of Pennsylvania, Philadelphia, PA) then inserted between beta-globin constitutive exons 1 and 2 in the pCAT7-Glo1 parental minigene vector (also a gift from Kristen Lynch) to construct FMNL3 minigene. A neonatal mouse brain cDNA library was used for screening the interaction partners of various WNK3 baits (1474–1743, 1–146, and 490–782) in yeast strain L40. The assay was performed as described previously (3).

**Antibodies.** Anti-Myc antibody (9E10) was from the National Cell Culture Center and used at a dilution of 1:1,000 for immunoblotting and 1:100 for immunoprecipitation. For immunofluorescence, anti-myc antibody was purchased from Santa Cruz. Anti-Flag antibody was from Sigma and used at 1:10,000 for immunoblotting, 1:1,000 for immunoprecipitation, and 1:10,000 for immunostaining. Anti-RBM9 and anti-WNK3 antibodies were purchased from Bethyl Laboratories and Santa Cruz, respectively, and used at 1:1,000 for

immunoblotting. Anti-EEF1A1 and anti-EEF2 antibodies were from Millipore.

**Cell Culture, Transfection, Immunoblotting, Immunoprecipitation, and Immunofluorescence.** HEK293 cells (ATCC) were grown in Dulbecco's modified Eagle medium supplemented with 10% (vol/vol) FBS, 1 mM L-glutamine, and 100 units/mL penicillin/streptomycin at 37 °C under 5% CO<sub>2</sub>. The cells were reverse-transfected with Fugene 6 (Roche) and then harvested for analysis 36–48 h later, unless specified. For RNAi, the cells were transfected with siFox-2 oligonucleotides (sense, gguucgaaacuuucgagaatt; antisense, uucucgaaaguuacgaaccg) with Lipofectamine RNAiMax (Invitrogen) following the manufacturer's protocol. For immunoblotting, cultured cells were lysed with 25 mM Hepes (pH 7.6), 150 mM NaCl, 0.1% Triton X-100, 10% glycerol, 1 mM EDTA, 50 µg/mL RNase A, 0.5 mM sodium orthovanadate, 20 µg/mL aprotinin, 10 µg/mL pepstatin A, 10 µg/mL leupeptin, and 1 mM phenylmethylsulfonyl fluoride) on ice for 45 min. Insoluble material was removed by centrifugation at 15,000 × g for 15 min at 4 °C. Protein concentration was determined by Bradford assay using BSA as standard. Soluble proteins from each sample were resolved by SDS/PAGE and transferred to nitrocellulose membranes. Membranes were blocked with 5% nonfat milk for 1 h at room temperature and then incubated with primary antibody. For immunoprecipitation, lysates were precleared by incubation with 50 µL of 50% slurry of protein A/G-Agarose (Santa Cruz) for 1 h at 4 °C. Cleared lysates were incubated with M2-agarose (Sigma) or indicated antibody and 30 µL of 50% slurry of protein A/G-Agarose at 4 °C overnight. The agarose beads were washed three times with lysis buffer, resolved by SDS/PAGE, and blotted as above. Cells were grown on glass chamber slide (Lab-Tek) for immunofluorescence. The process was done as previously described (4).

**Phosphorylation Site Mapping.** Kinase reactions were performed as noted in *Experimental Procedures, In Vitro Kinase Assays*. Proteins were separated on gels and visualized through colloidal Coomassie blue staining. Proteins were extracted from the gel and subjected to trypsin digestion. Phosphorylation sites on the digested proteins were identified by precursor ion scanning and nano-electrospray tandem mass spectrometry (MS/MS) as described previously (5).

1. Xu B, et al. (2000) WNK1, a novel mammalian serine/threonine protein kinase lacking the catalytic lysine in subdomain II. *J Biol Chem* 275:16795–16801.
2. Dorwart MR, Shcheynikov N, Wang Y, Stippec S, Muallem S (2007) SLC26A9 is a Cl<sup>-</sup> channel regulated by the WNK kinases. *J Physiol* 584:333–345.
3. Lee BH, et al. (2004) WNK1 phosphorylates synaptotagmin 2 and modulates its membrane binding. *Mol Cell* 15:741–751.

4. Tu SW, Bugde A, Luby-Phelps K, Cobb MH (2011) WNK1 is required for mitosis and abscission. *Proc Natl Acad Sci USA* 108:1385–1390.
5. Shu H, Chen S, Bi Q, Mumby M, Brekken DL (2004) Identification of phosphoproteins and their phosphorylation sites in the WEHI-231 B lymphoma cell line. *Mol Cell Proteomics* 3:279–286.









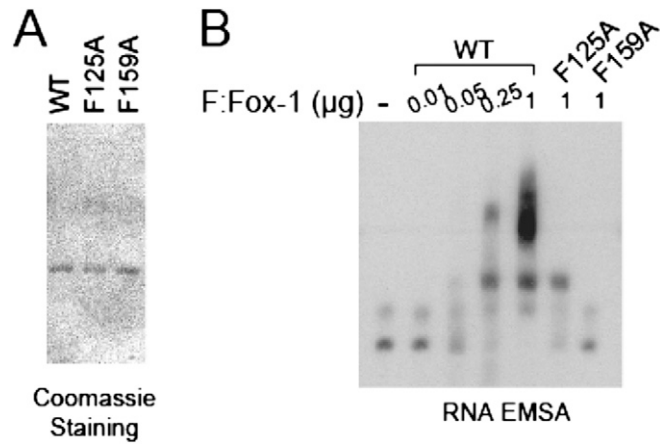

**Fig. 55.** Fox-1 recognizes (U)GCAUG elements through its RRM. (A) Coomassie blue-stained gel of FLAG-Fox-1 (F:Fox) proteins purified from bacteria. WT indicates wild-type. Both F125A and F159A are mutants that inactivate RNA binding ability. (B) The indicated amounts of F:Fox-1 proteins were incubated with RNA template with a (U)GCAUG element for RNA EMSA. The reaction was visualized using chemiluminescence detection as described in *Experimental Procedures*.

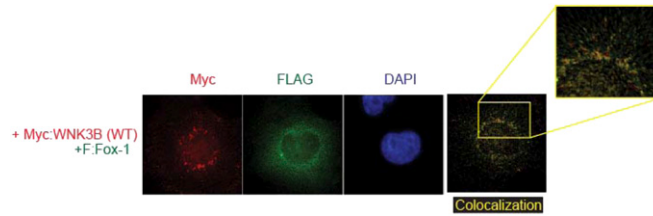

**Fig. 56.** Colocalization of WNK3 and Fox-1. Colocalization of Myc:WNK3 and F:Fox-1 was analyzed through Imaris software and shown as yellow. The magnified region is marked with a yellow box.
